# Supplementary material
Source: PubMed Central journal article supplement (PMC4751231)
Supplement: supp_kwv120_kwv120supp.pdf [file supp_kwv120_kwv120supp.pdf]

Web Figure 1. Order of selection of results from studies of occupational and household product exposures with overlapping populations in the meta-analysis of all studies combined, 1987-2013. AML, acute myeloid leukemia; ALL, acute lymphocytic leukemia. The symbol ">" indicates "selected before" and designates the order of selection

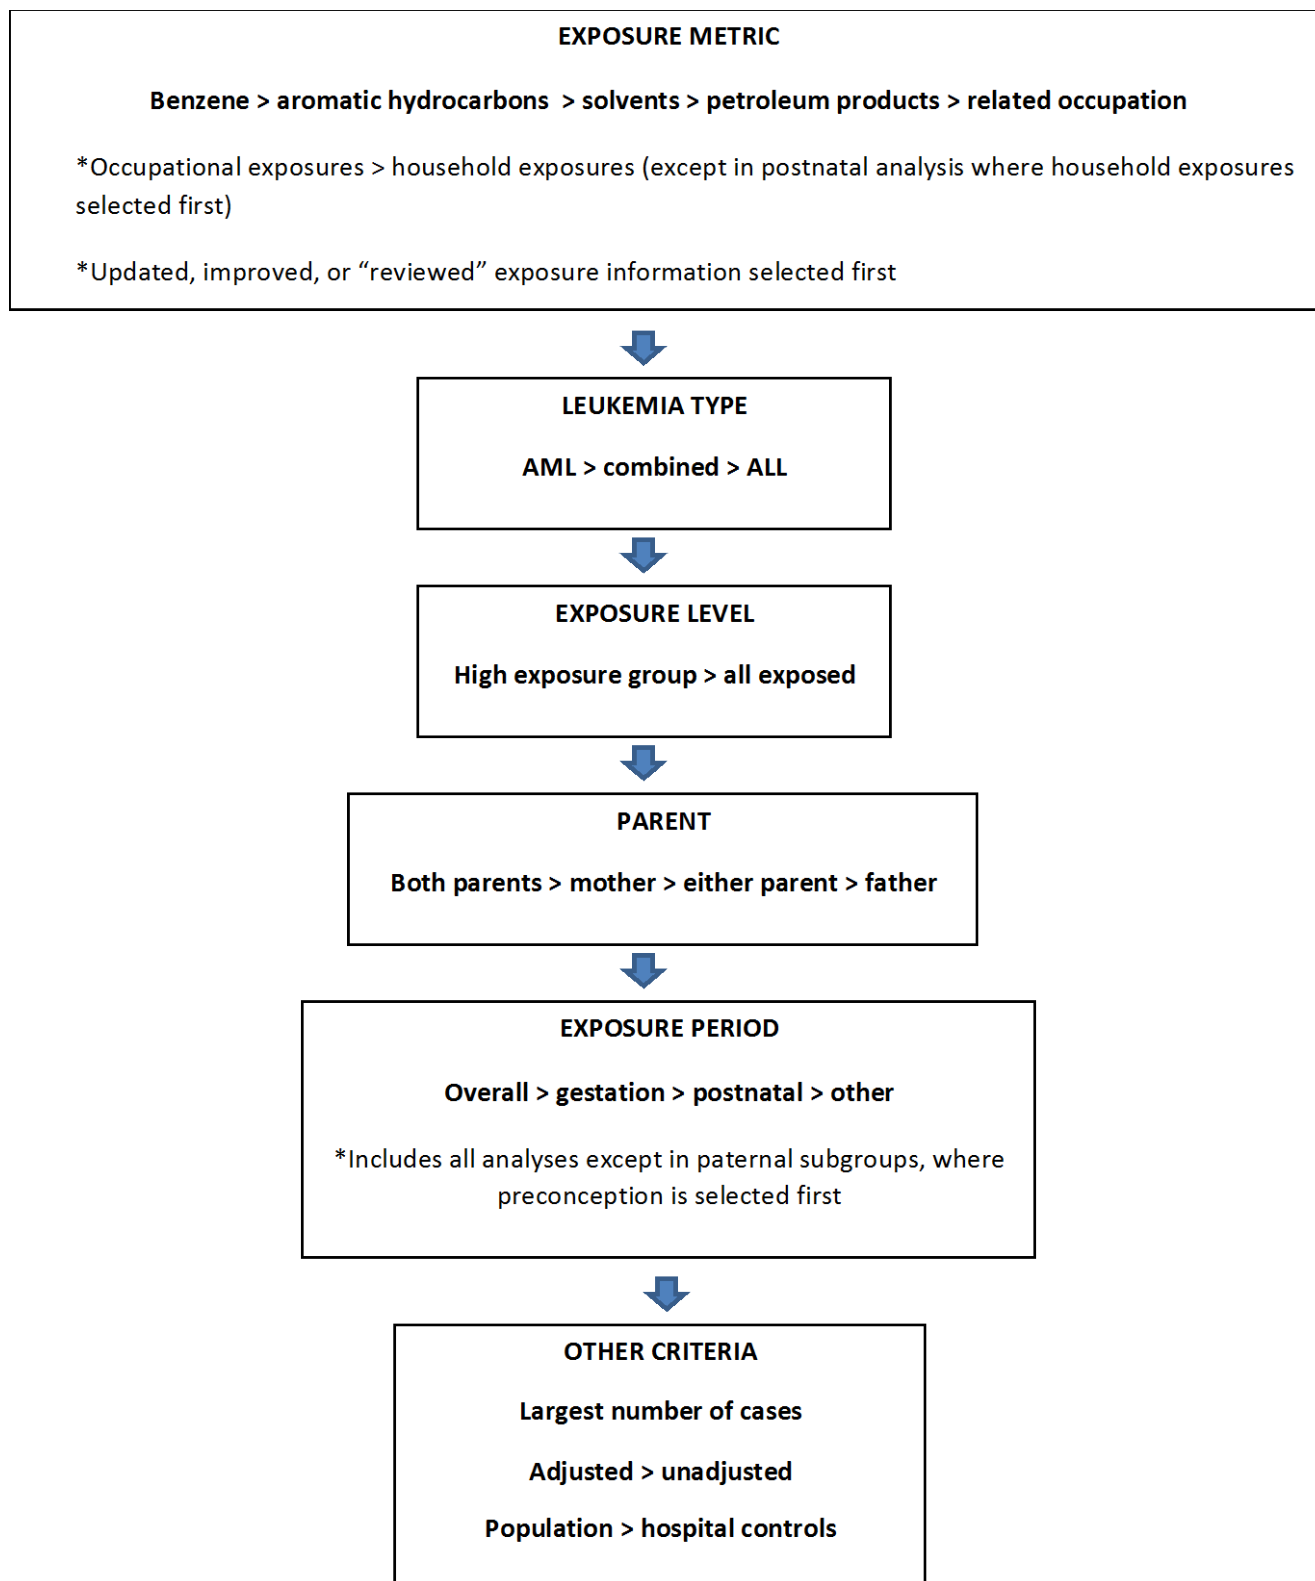

Web Figure 2. Order of selection of results from studies of traffic density or traffic pollution models with overlapping populations in the meta-analysis of all studies combined, 1999-2014. AML, acute myeloid leukemia; ALL, acute lymphocytic leukemia; CALINE4, California LINE Dispersion Model version 4. The symbol ">" indicates "selected before" and designates the order of selection

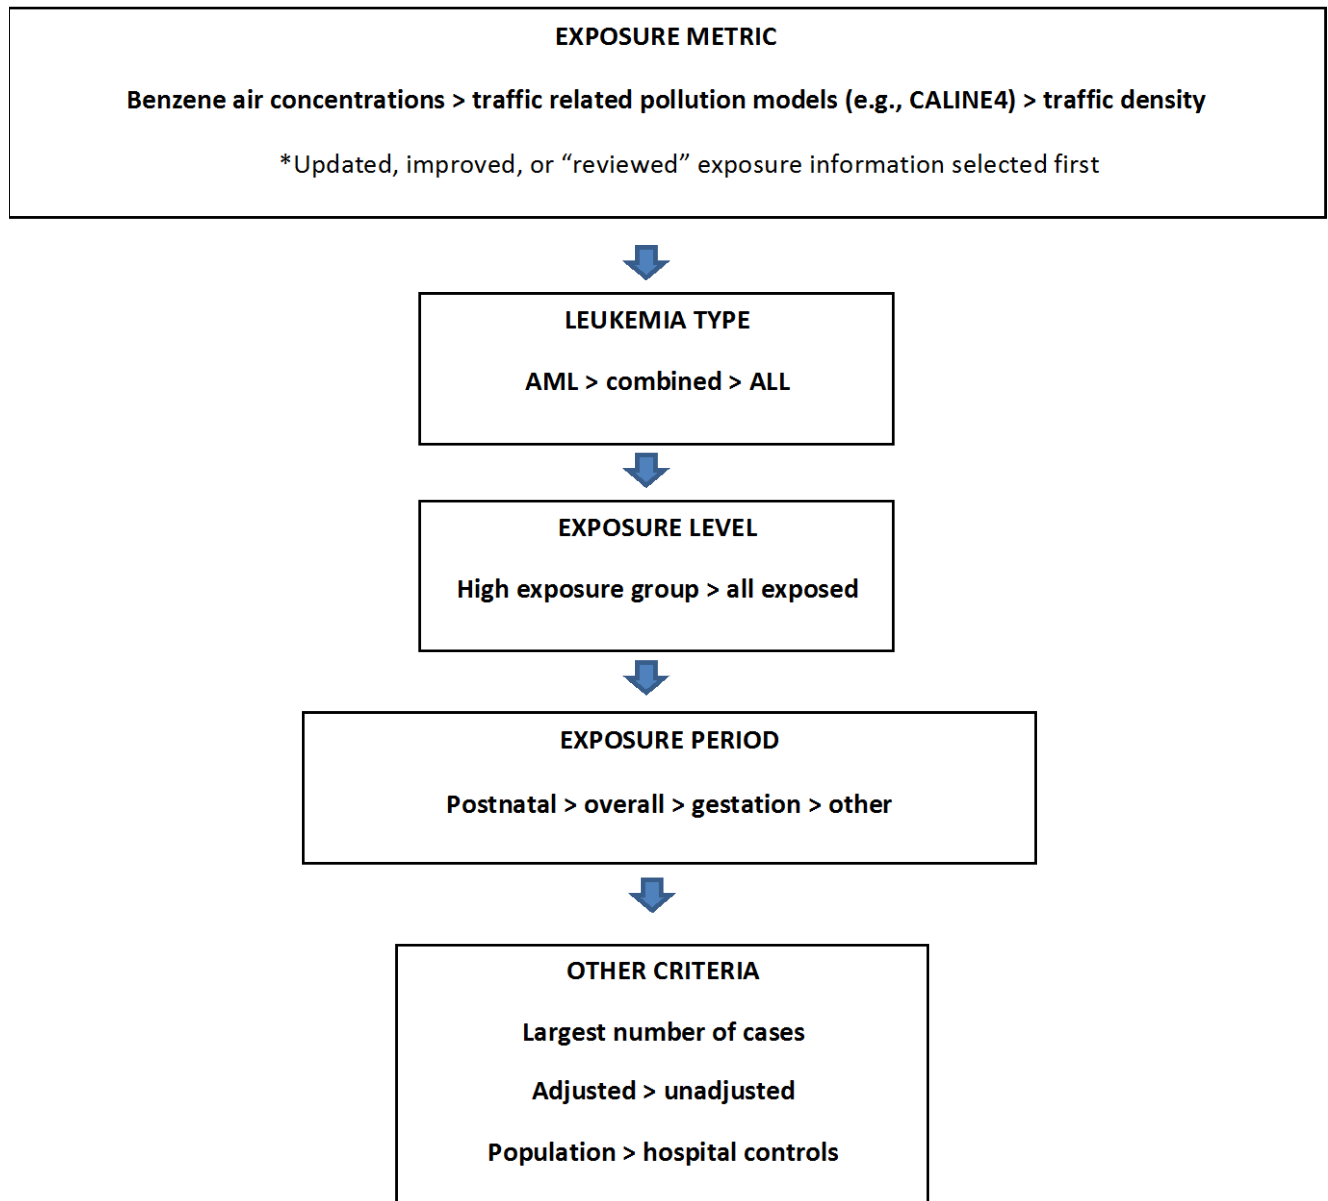

Web Figure 3. Literature search process flow chart, 1974-2014

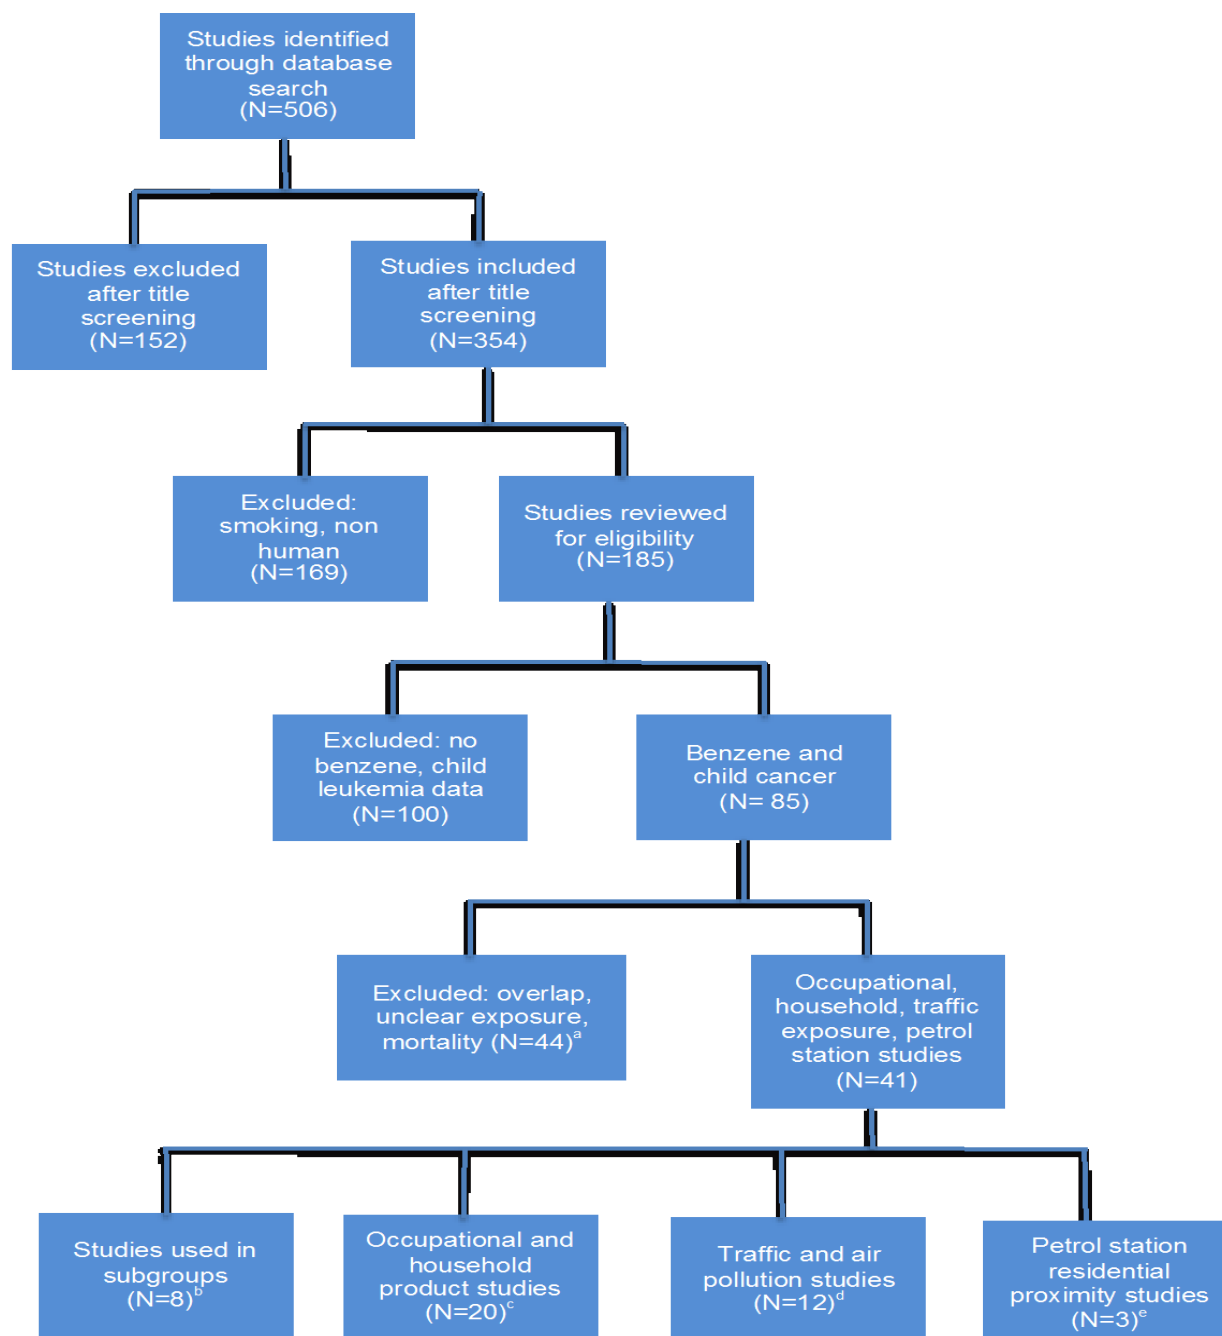

<sup>a</sup> Studies excluded for the following reasons: broad or unclear exposure metric, leukemia mortality, no relative risk estimate or confidence interval, population with other potential risk factor, exposure assessed after cancer diagnosis, or overlapping population (listed in Web Table 1)

<sup>b</sup> These studies had populations that overlapped with other studies included in the meta-analysis of all studies combined but were used in some subgroup analyses (Web Table 2)

<sup>c</sup> These studies are included in the meta-analysis of all occupational and household product exposure studies combined (Table 1)

<sup>d</sup> These studies are included in the meta-analysis of all traffic density and traffic-related pollution studies combined (Table 2)

<sup>e</sup> These studies are shown in Table 2. Two of these studies overlap with studies in the traffic density or traffic-related air pollution meta-analysis

**Web Table 1. Studies Excluded From the Meta-analysis, 1974-2013<sup>a</sup>**

| <b>Author, Year (Reference)</b>             | <b>Reason for Exclusion</b>                                                                        |
|---------------------------------------------|----------------------------------------------------------------------------------------------------|
| Alderton <i>et al.</i> , 2006 (1)           | Population with other potential risk factor (Down syndrome children)                               |
| Bailey <i>et al.</i> , 2011 (2)             | Broad or unclear exposure (paint)                                                                  |
| Dickinson <i>et al.</i> , 2003 (3)          | Broad or unclear exposure (proximity to railways)                                                  |
| Fabia and Thuy, 1974 (4)                    | Mortality                                                                                          |
| Feychting <i>et al.</i> , 1998 (5)          | Population with other potential risk factor (residence within 300m of power lines)                 |
| Ghosh <i>et al.</i> , 2013 (6)              | Overlap with Heck <i>et al.</i> , 2014 (7)                                                         |
| Gold <i>et al.</i> , 1982 (8)               | Broad or unclear exposure (driver, mechanic, railroad worker combined)                             |
| Hakulinen <i>et al.</i> , 1976 (9)          | Broad or unclear exposure (hydrocarbon-related occupations)                                        |
| Hearey <i>et al.</i> , 1980 (10)            | Broad or unclear exposure (proximity to petrochemical facilities)                                  |
| Heminiki <i>et al.</i> , 1981 (11)          | Broad or unclear exposure (machine repair)                                                         |
| Hicks <i>et al.</i> , 1984 (12)             | Broad or unclear exposure (aircraft mechanic)                                                      |
| Hurtig <i>et al.</i> , 2004 (13)            | Broad or unclear exposure (proximity to oil fields)                                                |
| Kaatsch <i>et al.</i> , 1998 (14)           | No RR or CI                                                                                        |
| Knox, 2000 (15)                             | Broad or unclear exposure (proximity to incinerators, landfill)                                    |
| Knox, 2005 (16)                             | Mortality; broad or unclear exposure (oil combustion)                                              |
| Knox, 2005 (17)                             | Mortality; no RR or CI (outward/inward migration ratios)                                           |
| Knox, 2006 (18)                             | No RR or CI (birth/death ratios)                                                                   |
| Knox and Gilman, 1997 (19)                  | Mortality; broad or unclear exposure (proximity to benzene refining)                               |
| Knox <i>et al.</i> , 1994 (20)              | Broad or unclear exposure (proximity to oil refineries)                                            |
| Kwa and Fine, 1980 (21)                     | Mortality                                                                                          |
| Lagorio <i>et al.</i> , 2013 (22)           | Personal benzene exposure measured after diagnosis                                                 |
| Lyons <i>et al.</i> , 1995 (23)             | Broad or unclear exposure (proximity to a petrochemical plant)                                     |
| McKinney <i>et al.</i> , 1987 (24)          | Broad or unclear exposure (painters, miners...)                                                    |
| Nordlinder and Jarvholm, 1997 (25)          | No RR or CI                                                                                        |
| Olsen <i>et al.</i> , 1991 (26)             | Broad or unclear exposure (e.g. machine repair); no RR or CI                                       |
| Pan <i>et al.</i> , 1994 (27)               | Broad or unclear exposure (proximity to petrochemical facilities)                                  |
| Raaschou-Nielsen <i>et al.</i> , 2002 (28)  | Overlap with Raaschou-Nielsen <i>et al.</i> , 2001                                                 |
| Reynolds <i>et al.</i> , 2001 (29)          | Overlap with Heck <i>et al.</i> , 2014 (7)                                                         |
| Reynolds <i>et al.</i> , 2003 (30)          | Broad or unclear exposures (hazardous air pollutant scores)                                        |
| Reynolds <i>et al.</i> , 2004 (31)          | Overlap with Heck <i>et al.</i> , 2014 (7)                                                         |
| Sanders <i>et al.</i> , 1981 (32)           | Mortality; broad or unclear exposure (hydrocarbon-related occupations)                             |
| Sans <i>et al.</i> , 1995 (33)              | Broad or unclear exposure (distance to a petrochemical plant)                                      |
| Schuz <i>et al.</i> , 2000 (34)             | Population with other potential risk factor (one group lived within 15km of a nuclear power plant) |
| Shaw <i>et al.</i> , 1984 (35)              | No RR or CI                                                                                        |
| Sung <i>et al.</i> , 2008 (36)              | Broad or unclear exposure (electronics workers)                                                    |
| Van Duijn <i>et al.</i> , 1994 (37)         | Broad or unclear exposure (hydrocarbon-related occupations)                                        |
| Van Steensel-Moll <i>et al.</i> , 1985 (38) | Broad or unclear exposure (mechanic, machinist, gas station, miner combined)                       |
| Vianna <i>et al.</i> , 1984 (39)            | No RR or CI                                                                                        |
| Weng <i>et al.</i> , 2008 (40)              | Mortality; broad or unclear exposure (employed in petrochemical industry)                          |
| Weng <i>et al.</i> , 2008 (41)              | Mortality                                                                                          |
| Weng <i>et al.</i> , 2009 (42)              | Mortality                                                                                          |
| Wilkinson <i>et al.</i> , 1999 (43)         | Broad or unclear exposure (proximity to oil refineries)                                            |
| Yu <i>et al.</i> , 2006 (44)                | Broad or unclear exposure (proximity to petrochemical plants)                                      |
| Zack <i>et al.</i> , 1980 (45)              | Broad or unclear exposure (hydrocarbon-related occupations)                                        |

Abbreviations: CI, confidence interval; RR, relative risk estimate

<sup>a</sup>Due to space limitations this table does not include studies excluded for the following reasons: smoking studies, unpublished studies (government reports, abstracts), studies involving leukemia cases ages >19 years old

**Web Table 2. Studies With Overlapping Populations Used in Subgroup Analyses, 1989-2014**

| Overlapping Study                                    | Study Selected for Main Analyses <sup>a</sup> | Reason for Selection of the Study Used in the Main Analysis | Subgroup in Which the Overlapping Study was Used |
|------------------------------------------------------|-----------------------------------------------|-------------------------------------------------------------|--------------------------------------------------|
| <b>Occupational and household product use:</b>       |                                               |                                                             |                                                  |
| Bailey <i>et al.</i> , 2011 (46)                     | Reid <i>et al.</i> , 2011 (47)                | More direct exposure metric: occupational benzene exposure  | Paternal preconception                           |
| Freedman <i>et al.</i> , 2001 (48)                   | Shu <i>et al.</i> , 1999 (49)                 | More direct exposure metric: occupational benzene exposure  | Home product use                                 |
| Keegan <i>et al.</i> , 2012 (50)                     | McKinney <i>et al.</i> , 2008 (51)            | Maternal exposure                                           | Paternal solvent exposure                        |
| McKinney <i>et al.</i> , 2003 (52)                   | McKinney <i>et al.</i> , 2008 (51)            | Gestational exposure, refined exposure assessment           | Maternal and paternal periconception; Paternal   |
| <b>Traffic density and traffic pollution models:</b> |                                               |                                                             |                                                  |
| Heck <i>et al.</i> , 2013 (53)                       | Heck <i>et al.</i> , 2014 (7)                 | More direct exposure metric (air benzene concentrations)    | Traffic density                                  |
| Reynolds <i>et al.</i> , 2002 (54)                   | Heck <i>et al.</i> , 2014 (7)                 | More direct exposure metric (air benzene concentrations)    | Postnatal; Diagnosis; Traffic density            |
| Savitz and Feingold, 1989 (55)                       | Pearson <i>et al.</i> , 2000 (56)             | More detailed modeling of traffic density                   | ALL; Socioeconomic status adjusted               |
| Von Behren <i>et al.</i> , 2008 (57)                 | Heck <i>et al.</i> , 2014 (7)                 | More direct exposure metric (air benzene concentrations)    | Postnatal; Diagnosis                             |

<sup>a</sup> The study selected for the meta-analysis of all occupational or household product use studies combined or the meta-analysis of all traffic-related pollution studies combined

Web Figure 4. Funnel plots of studies included in the meta-analyses of studies involving traffic-related pollution models with (A) and without (B) the largest study of Badaloni *et al.*, 2013 (58), 2001-2014

A.

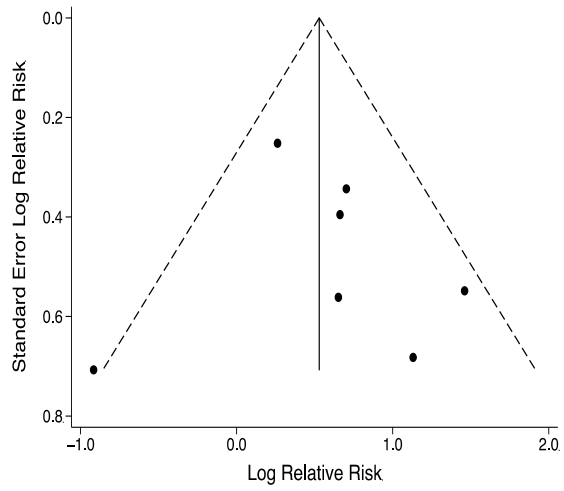

B.

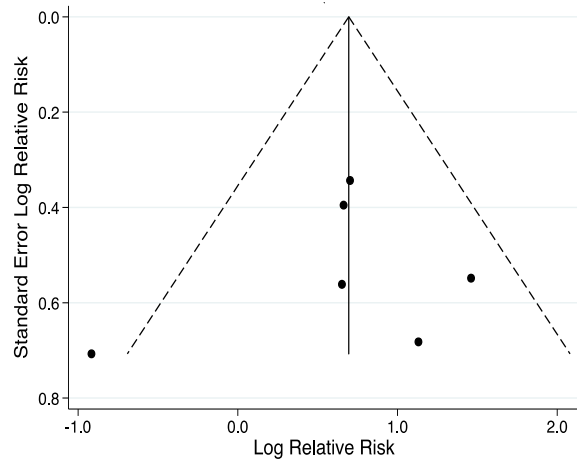

## WEB TABLES AND FIGURES REFERENCES

1. Alderton LE, Spector LG, Blair CK, et al. Child and maternal household chemical exposure and the risk of acute leukemia in children with Down's syndrome: a report from the Children's Oncology Group. *Am J Epidemiol.* 2006; 164(3):212-221.
2. Bailey HD, Milne E, de Klerk NH, et al. Exposure to house painting and the use of floor treatments and the risk of childhood acute lymphoblastic leukemia. *Int J Cancer.* 2011; 128(10):2405-2414.
3. Dickinson HO, Hammal DM, Dummer TJ, et al. Childhood leukaemia and non-Hodgkin's lymphoma in relation to proximity to railways. *Br J Cancer.* 2003; 88(5):695-698.
4. Fabia J, Thuy TD. Occupation of father at time of birth of children dying of malignant diseases. *Br J Prev Soc Med.* 1974; 28(2):98-100.
5. Feychting M, Svensson D, Ahlbom A. Exposure to motor vehicle exhaust and childhood cancer. *Scand J Work Environ Health.* 1998; 24(1):8-11.
6. Ghosh JK, Heck JE, Cockburn M, et al. Prenatal exposure to traffic-related air pollution and risk of early childhood cancers. *Am J Epidemiol.* 2013; 178(8):1233-1239.
7. Heck JE, Park AS, Qiu J, et al. Risk of leukemia in relation to exposure to ambient air toxics in pregnancy and early childhood. *Int J Hyg Environ Health.* 2014; 217(6):662-668.
8. Gold EB, Diener MD, Szklo M. Parental occupations and cancer in children--a case-control study and review of the methodologic issues. *J Occup Med.* 1982; 24(8):578-584.
9. Hakulinen T, Salonen T, Teppo L. Cancer in the offspring of fathers in hydrocarbon-related occupations. *Br J Prev Soc Med.* 1976; 30(2):138-140.
10. Hearey CD, Ury H, Siegelau A, et al. Lack of association between cancer incidence and residence near petrochemical industry in the San Francisco Bay Area. *J Natl Cancer Inst.* 1980; 64(6):1295-1299.

11. Hemminki K, Saloniemi I, Salonen T, et al. Childhood cancer and parental occupation in Finland. *J Epidemiol Community Health*. 1981; 35(1):11-15.
12. Hicks N, Zack M, Caldwell GG, et al. Childhood cancer and occupational radiation exposure in parents. *Cancer*. 1984; 53(8):1637-1643.
13. Hurtig AK, San Sebastian M. Incidence of childhood leukemia and oil exploitation in the Amazon basin of Ecuador. *Int J Occup Environ Health*. 2004; 10(3):245-250.
14. Kaatsch P, Kaletsch U, Meinert R, et al. German case control study on childhood leukaemia--basic considerations, methodology and summary of the results. *Klin Padiatr*. 1998; 210(4):185-191.
15. Knox E. Childhood cancers, birthplaces, incinerators and landfill sites. *Int J Epidemiol*. 2000; 29(3):391-397.
16. Knox EG. Oil combustion and childhood cancers. *J Epidemiol Community Health*. 2005; 59(9):755-760.
17. Knox EG. Childhood cancers and atmospheric carcinogens. *J Epidemiol Community Health*. 2005; 59(2):101-105.
18. Knox EG. Roads, railways, and childhood cancers. *J Epidemiol Community Health*. 2006; 60(2):136-141.
19. Knox EG, Gilman EA. Hazard proximities of childhood cancers in Great Britain from 1953-80. *J Epidemiol Community Health*. 1997; 51(2):151-159.
20. Knox EG. Leukaemia clusters in childhood: geographical analysis in Britain. *J Epidemiol Community Health*. 1994; 48(4):369-376.
21. Kwa SL, Fine LJ. The association between parental occupation and childhood malignancy. *J Occup Med*. 1980; 22(12):792-794.
22. Lagorio S, Ferrante D, Ranucci A, et al. Exposure to benzene and childhood leukaemia: a pilot case-control study. *BMJ Open*. 2013; 3(2).



23. Lyons RA, Monaghan SP, Heaven M, et al. Incidence of leukaemia and lymphoma in young people in the vicinity of the petrochemical plant at Baglan Bay, South Wales, 1974 to 1991. *Occup Environ Med.* 1995; 52(4):225-228.
24. McKinney PA, Cartwright RA, Saiu JM, et al. The inter-regional epidemiological study of childhood cancer (IRESCC): a case control study of aetiological factors in leukaemia and lymphoma. *Arch Dis Child.* 1987; 62(3):279-287.
25. Nordlinder R, Jarvholm B. Environmental exposure to gasoline and leukemia in children and young adults--an ecology study. *Int Arch Occup Environ Health.* 1997; 70(1):57-60.
26. Olsen JH, de Nully Brown P, Schulgen G, et al. Parental employment at time of conception and risk of cancer in offspring. *Eur J Cancer.* 1991; 27(8):958-965.
27. Pan BJ, Hong YJ, Chang GC, et al. Excess cancer mortality among children and adolescents in residential districts polluted by petrochemical manufacturing plants in Taiwan. *J Toxicol Environ Health.* 1994; 43(1):117-129.
28. Raaschou-Nielsen O, Hertel O, Thomsen BL, et al. [Traffic-related air pollution at the place of residence and risk of cancer among children]. *Ugeskr Laeger.* 2002; 164(17):2283-2287.
29. Reynolds P, Elkin E, Scalf R, et al. A case-control pilot study of traffic exposures and early childhood leukemia using a geographic information system. *Bioelectromagnetics.* 2001; Suppl 5:S58-68.
30. Reynolds P, Von Behren J, Gunier RB, et al. Childhood cancer incidence rates and hazardous air pollutants in California: an exploratory analysis. *Environ Health Perspect.* 2003; 111(4):663-668.
31. Reynolds P, Von Behren J, Gunier RB, et al. Residential exposure to traffic in California and childhood cancer. *Epidemiology.* 2004; 15(1):6-12.

32. Sanders BM, White GC, Draper GJ. Occupations of fathers of children dying from neoplasms. *J Epidemiol Community Health*. 1981; 35(4):245-250.
33. Sans S, Elliott P, Kleinschmidt I, et al. Cancer incidence and mortality near the Baglan Bay petrochemical works, South Wales. *Occup Environ Med*. 1995; 52(4):217-224.
34. Schuz J, Kaletsch U, Meinert R, et al. Risk of childhood leukemia and parental self-reported occupational exposure to chemicals, dusts, and fumes: results from pooled analyses of German population-based case-control studies. *Cancer Epidemiol Biomarkers Prev*. 2000; 9(8):835-838.
35. Shaw G, Lavey R, Jackson R, et al. Association of childhood leukemia with maternal age, birth order, and paternal occupation. A case-control study. *Am J Epidemiol*. 1984; 119(5):788-795.
36. Sung TI, Wang JD, Chen PC. Increased risk of cancer in the offspring of female electronics workers. *Reprod Toxicol*. 2008; 25(1):115-119.
37. van Duijn CM, van Steensel-Moll HA, Coebergh JW, et al. Risk factors for childhood acute non-lymphocytic leukemia: an association with maternal alcohol consumption during pregnancy? *Cancer Epidemiol Biomarkers Prev*. 1994; 3(6):457-460.
38. van Steensel-Moll HA, Valkenburg HA, van Zanen GE. Childhood leukemia and parental occupation. A register-based case-control study. *Am J Epidemiol*. 1985; 121(2):216-224.
39. Vianna NJ, Kovasznay B, Polan A, et al. Infant leukemia and paternal exposure to motor vehicle exhaust fumes. *J Occup Med*. 1984; 26(9):679-682.
40. Weng HH, Tsai SS, Chiu HF, et al. Association of childhood leukemia with residential exposure to petrochemical air pollution in Taiwan. *Inhal Toxicol*. 2008; 20(1):31-36.
41. Weng HH, Tsai SS, Chen CC, et al. Childhood leukemia development and correlation with traffic air pollution in Taiwan using nitrogen dioxide as an air pollutant marker. *J Toxicol Environ Health A*. 2008; 71(7):434-438.

42. Weng HH, Tsai SS, Chiu HF, et al. Childhood leukemia and traffic air pollution in Taiwan: petrol station density as an indicator. *J Toxicol Environ Health A*. 2009; 72(2):83-87.
43. Wilkinson P, Thakrar B, Walls P, et al. Lymphohaematopoietic malignancy around all industrial complexes that include major oil refineries in Great Britain. *Occup Environ Med*. 1999; 56(9):577-580.
44. Yu CL, Wang SF, Pan PC, et al. Residential exposure to petrochemicals and the risk of leukemia: using geographic information system tools to estimate individual-level residential exposure. *Am J Epidemiol*. 2006; 164(3):200-207.
45. Zack M, Cannon S, Loyd D, et al. Cancer in children of parents exposed to hydrocarbon-related industries and occupations. *Am J Epidemiol*. 1980; 111(3):329-336.
46. Bailey HD, de Klerk NH, Fritschi L, et al. Refuelling of vehicles, the use of wood burners and the risk of acute lymphoblastic leukaemia in childhood. *Paediatr Perinat Epidemiol*. 2011; 25(6):528-539.
47. Reid A, Glass DC, Bailey HD, et al. Parental occupational exposure to exhausts, solvents, glues and paints, and risk of childhood leukemia. *Cancer Causes Control*. 2011; 22(11):1575-1585.
48. Freedman DM, Stewart P, Kleinerman RA, et al. Household solvent exposures and childhood acute lymphoblastic leukemia. *Am J Public Health*. 2001; 91(4):564-567.
49. Shu XO, Stewart P, Wen WQ, et al. Parental occupational exposure to hydrocarbons and risk of acute lymphocytic leukemia in offspring. *Cancer Epidemiol Biomarkers Prev*. 1999; 8(9):783-791.
50. Keegan TJ, Bunch KJ, Vincent TJ, et al. Case-control study of paternal occupation and childhood leukaemia in Great Britain, 1962-2006. *Br J Cancer*. 2012; 107(9):1652-1659.
51. McKinney PA, Raji OY, van Tongeren M, et al. The UK Childhood Cancer Study: maternal occupational exposures and childhood leukaemia and lymphoma. *Radiat Prot Dosimetry*. 2008; 132(2):232-240.

52. McKinney PA, Fear NT, Stockton D, et al. Parental occupation at periconception: findings from the United Kingdom Childhood Cancer Study. *Occup Environ Med.* 2003; 60(12):901-909.
53. Heck JE, Wu J, Lombardi C, et al. Childhood cancer and traffic-related air pollution exposure in pregnancy and early life. *Environ Health Perspect.* 2013; 121(11-12):1385-1391.
54. Reynolds P, Von Behren J, Gunier RB, et al. Traffic patterns and childhood cancer incidence rates in California, United States. *Cancer Causes Control.* 2002; 13(7):665-673.
55. Savitz DA, Feingold L. Association of childhood cancer with residential traffic density. *Scand J Work Environ Health.* 1989; 15(5):360-363.
56. Pearson RL, Wachtel H, Ebi KL. Distance-weighted traffic density in proximity to a home is a risk factor for leukemia and other childhood cancers. *J Air Waste Manag Assoc.* 2000; 50(2):175-180.
57. Von Behren J, Reynolds P, Gunier RB, et al. Residential traffic density and childhood leukemia risk. *Cancer Epidemiol Biomarkers Prev.* 2008; 17(9):2298-2301.
58. Badaloni C, Ranucci A, Cesaroni G, et al. Air pollution and childhood leukaemia: a nationwide case-control study in Italy. *Occup Environ Med.* 2013; 70(12):876-883.
